# Supplementary material for: Risk Factors for Pregnancy Complications and Postpartum Glucose Intolerance in Women With Gestational Diabetes Mellitus
Source: Research Square preprint supplement (doi:10.21203/rs.3.rs-116971/v1), 2020-12-09
Supplement: Supplementary file 2 [file b7714b881b7d454ef02019ac.xlsx]

## Sheet: GI
	Table 5. Clinical characteristics of participants and results of logistic regression analyses of factors associated with postpartum GI in pregnant women with GDM
	Variable		postpartum GI	non-postpartum GI	P values		Univariate analysis				Multivariable analysis
			n=22	n=93			Odds ratio	95% CI	P values		Odds ratio	95% CI	P values
	Clinical findings of pregnant women
		Age (years)	37 (29–42)	37 (21–45)	0.9		1	0.9–1.1	0.7
		Gravidity	2 (1–5)	2 (1–10)	0.3		0.8	0.6–1.2	0.3
		Parity	1 (0–3)	0 (0–4)	0.3		1.3	0.8–2.1	0.4
		BMI prior to pregnancy (kg/m2)	24.1 (16.4–33.9)	22.3 (16.4–34.7)	0.1		1.1	1.0–1.2	0.2
		Weight gain during pregnancy (kg)	5.0 (-9.0–13.2)	7.2 (-5–22.7)	0.1		0.9	0.8–1.0	0.1
		History of hypertension	0.091	0.065	0.6		1.5	0.3–7.7	0.7
		Family history of DM	0.318	0.387	0.7		0.7	0.3–2.0	0.5
		GW at diagnosis of GDM	28 (16–32)	29 (11–38)	0.4		1	0.9–1.1	0.7
		Insulin therapy during pregnancy	0.364	0.409	0.9		0.8	0.3–2.2	0.7
	Parameters in antepartum 75g OGTT
		FBG (mg/dl)	84 (76–138)	82 (55–112)	0.2		1	1.0-1.1	<0.05		1	0.9–01.1	0.8
		1-h BG (mg/dl)	178 (123–226)	176 (120–235)	0.5		1	1.0–1.02	0.8
		2-h BG (mg/dl)	163 (122–206)	159 (86–248)	0.2		1	1.0–1.03	0.2
		Fasting IRI (µU/ml)	8 (4–26)	7 (2–35)	0.2		1	1.0–1.1	0.3
		1-h IRI (µU/ml)	58 (22–109)	61 (27–307)	0.3		1	0.98–1.0	0.2
		2-h IRI (µU/ml)	69 (20–150)	75 (15–501)	0.6		1	0.98–1.0	0.3
		AUC-glucose (mg min/dl）	18735 (15345–23820)	18180 (14880–23970)	0.2		1	1.0–1.005	0.1
		AUC-insulin (µU min/ml）	6713 (2205–12105)	6420 (2835–30060)	0.6		1	0.9998–1.0	0.3
		AUC-insulin/glucose	0.3 (0.1–0.6)	0.3 (0.2–1.8)	0.3		0.2	0.01–2.4	0.2
		HbA1c (%)	5.4 (4.8–6.2)	5.4 (4.9–6.2)	0.7		1.2	0.3–5.6	0.8
		HOMA-R	1.7 (0.8–8.9)	1.4 (0.4–7.8)	0.2		1.3	0.9–1.7	0.1
		HOMA-β	140 (60–220)	127 (-1080–504)	0.8		1	0.997–1.0	1
		Insulinogenic index	0.5 (0.2–1.5)	0.7 (0.0–3.6)	0.1		0.3	0.1–1.3	0.1
		Oral disposition index	1.4 (0.5–2.2)	1.7 (0.7–3.5)	<0.01		0.1	0.03–0.5	<0.01		0.1	0.02–0.7	<0.01
		Data are expresses as the median (range) or percentage.
		GI, glucose intolerance; GDM, gestational diabetes mellitus; DM; diabetes mellitus BMI, body mass index; GW, gestational week; OGTT, oral glucose tolerance test;
		FBG, fasting blood glucose; BG, blood glucose; IRI, immunoreactive insulin; AUC, area under the curve; HbA1c, hemoglobin A1c; HOMA, homeostasis model assessment;
		CI, confidence interval;
