# Supplementary material for: Risk Factors for Pregnancy Complications and Postpartum Glucose Intolerance in Women With Gestational Diabetes Mellitus
Source: Research Square preprint supplement (doi:10.21203/rs.3.rs-116971/v1), 2020-12-09
Supplement: Supplementary file 7 [file aacef016e0a452e35bc72e06.xlsx]

## Sheet: HDP
	Table 1. Clinical characteristics of participants and results of logistic regression analyses of factors associated with HDP in pregnant women with GDM
	Variable		HDP	non-HDP	P values		Univariate analysis				Multivariable analysis
			n=19	n=121			Odds ratio	95% CI	P values		Odds ratio	95% CI	P values
	Clinical findings of pregnant women
		Age (years)	39 (29–42)	36 (21–45)	0.2		1.1	1.0–1.2	0.2
		Gravidity	2 (1–6)	2 (1–10)	0.6		0.9	0.7–1.3	0.6
		Parity	0 (0–2)	0 (0–4)	0.8		1	0.5–1.8	1
		BMI prior to pregnancy (kg/m2)	24.1 (16.8–35.9)	22.4 (16.0–38.4)	<0.05		1.1	1.0–1.2	<0.05		1	0.9–1.2	0.9
		Weight gain during pregnancy (kg)	1.9 (-9.0–13.5)	7.3 (-8.7–22.7)	<0.01		0.8	0.8–0.9	<0.01		0.9	0.8–1.0	0.1
		History of hypertension	0.421	0.017	<0.01		43.3	8.2–229.4	<0.01		23.8	4.2–134.7	<0.01
		Family history of DM	0.368	0.397	1		0.9	0.3–2.4	0.8
		GW at diagnosis of GDM	28 (11–31)	29 (9–38)	0.1		0.9	0.87–1.0	0.2
		Insulin therapy during pregnancy	0.421	0.413	1		1	0.4–2.8	1
	Parameters in antepartum 75g OGTT
		FBG (mg/dl)	86 (73–95)	83 (55–138)	0.5		1	1.0–1.1	0.8
		1-h BG (mg/dl)	169 (111–197)	179 (114–239)	0.1		1	0.96–1.0	<0.05		1	0.96–1.0	0.3
		2-h BG (mg/dl)	155 (105–196)	160 (86–248)	0.2		1	0.97–1.0	0.3
		Fasting IRI (µU/ml)	8 (2–18)	8 (2–60)	1		1	0.9–1.1	0.7
		1-h IRI (µU/ml)	54 (22–115)	62 (27–307)	0.1		1	0.97–1.0	0.1
		2-h IRI (µU/ml)	67 (20–137)	76 (15–501)	0.2		1	0.98–1.0	0.2
		AUC glucose (mg min/dl）	18,000 (15,345–20,265)	18,465(13,830–23,970)	0.1		1	0.9994–1.0	0.1
		AUC insulin (µU min/ml）	5,760 (2,205–11,835)	6,645 (2,835–30,060)	0.3		1	0.9998–1.0	0.2
		AUC insulin/glucose	0.3 (0.1–0.8)	0.4 (0.2–1.8)	0.4		0.3	0.02–3.5	0.3
		HbA1c (%)	5.4 (4.8–6.2)	5.4 (5.0–6.3)	0.2		0.3	0.1–1.8	0.2
		HOMA-R	1.8 (0.4–4.1)	1.6 (0.4–16.1)	0.9		0.9	0.7–1.3	0.6
		HOMA-β	128.6 (40–504)	138.5 (-1,080–2,340)	0.6		1	0.99–1.0	0.9
		Insulinogenic index	0.5 (0.2–3.3)	0.6 (0.0–3.6)	0.5		1	0.4–2.5	1
		Oral disposition index	1.6 (1.2–3.3)	1.7 (0.5–3.5)	0.3		0.9	0.3–2.6	0.9
		Data are expressed as the median (range) or percentage.
		HDP, hypertensive disorders of pregnancy; GDM, gestational diabetes mellitus; DM; diabetes mellitus BMI, body mass index; GW, gestational week; OGTT, oral glucose tolerance test;
		FBG, fasting blood glucose; BG, blood glucose; IRI, immunoreactive insulin; AUC, area under the curve; HbA1c, hemoglobin A1c; HOMA, homeostasis model assessment;
		CI, confidence interval;
