# Supplementary material for: Risk Factors for Pregnancy Complications and Postpartum Glucose Intolerance in Women With Gestational Diabetes Mellitus
Source: Research Square preprint supplement (doi:10.21203/rs.3.rs-116971/v1), 2020-12-09
Supplement: Supplementary file 9 [file c6a05b8c3bc786a0a6759d37.xlsx]

## Sheet: PD
	Table 2. Clinical characteristics of participants and results of logistic regression analyses of factors associated with PD in pregnant women with GDM
	Variable		PD	non-PD	P values		Univariate analysis
			n=17	n=123			Odds ratio	95% CI	P values
	Clinical findings of pregnant women
		Age (years)	37 (29–42)	37 (21–45)	0.9		1	0.9–1.1	8
		Gravidity	2 (1–5)	2 (1–10)	0.8		1	0.7–1.4	1
		Parity	1 (0–3)	0 (0–4)	<0.05		1.7	1.0–2.8	0.1
		BMI prior to pregnancy (kg/m2)	23.0 (18.9–31.2)	22.4 (16.0–38.4)	1		1	0.9–1.1	0.8
		Weight gain during pregnancy (kg)	6.0 (-1.3–18.7)	7.2 (-9.0–22.7)	0.3		1	0.9–1.1	0.5
		History of hypertension	0.294	0.04	<0.01		9.8	2.5–38.9	<0.01
		Family history of DM	0.412	0.39	1		1.1	0.4–3.1	0.9
		GW at diagnosis of GDM	28 (11–32)	29 (9–38)	0.6		1	0.9–1.1	0.5
		Insulin therapy during pregnancy	0.353	0.423	0.8		0.7	0.3–2.1	0.6
	Parameters in antepartum 75g OGTT
		FBG (mg/dl)	82 (72–111)	84 (55–138)	0.6		1	1.0–1.1	0.6
		1-h BG (mg/dl)	180 (111–211)	177 (114–239)	0.9		1	0.98–1.0	0.7
		2-h BG (mg/dl)	159 (94–180)	159 (86–248)	0.3		1	0.97–1.0	0.2
		Fasting IRI (µU/ml)	8 (2–18)	8 (2–60)	0.7		1	0.9–1.1	0.9
		1-h IRI (µU/ml)	75 (27–210)	60 (22–307)	0.6		1	1.0–1.01	0.9
		2-h IRI (µU/ml)	76 (31–137)	75 (15–501)	0.9		1	0.99–1.0	0.5
		AUC glucose (mg min/dl）	18,000 (15,345–21,150)	18,450 (13,830–23,970)	0.7		1	0.99–1.0	0.45
		AUC insulin (µU min/ml）	8,940 (2,835–13,470)	6,555 (2,205–30,060)	0.5		1.001	0.99–1.0	1
		AUC insulin/glucose	0.5 (0.2–0.8)	0.4 (0.1–1.8)	0.4		1.2	0.2–8.4	0.9
		HbA1c (%)	5.3 (4.8–6.0)	5.4 (4.9–6.3)	0.6		0.5	0.1–2.8	0.44
		HOMA-R	1.8 (0.4–4.4)	1.6 (0.4-16.2)	0.6		1	0.7–1.3	0.9
		HOMA-β	148 (55–216)	131 (-1,080–2,340)	0.8		1	0.997–1.0	0.8
		Insulinogenic index	0.6 (0.2–3.3)	0.6 (0.0–3.6)	0.5		1.5	0.7–3.4	0.3
		Oral disposition index	1.7 (0.8–2.7)	1.7 (0.5–3.5)	0.5		1.4	0.5–4.0	0.5
		Data are expressed as the median (range) or percentage.
		PD, preterm delivery; GDM, gestational diabetes mellitus; DM; diabetes mellitus BMI, body mass index; GW, gestational week; OGTT, oral glucose tolerance test;
		FBG, fasting blood glucose; BG, blood glucose; IRI, immunoreactive insulin; AUC, area under the curve; HbA1c, hemoglobin A1c; HOMA, homeostasis model assessment;
		CI, confidence interval;
